# Supplementary material for: Laboratory variables‐based artificial neural network models for predicting fatty liver disease: A retrospective study
Source: PubMed Central journal article supplement (PMC11406433; doi:10.1515/med-2024-1031), 2024-09-13
Supplement: med-2024-1031-sm.pdf [file med-2024-1031-sm.pdf]

## Supplementary material

Laboratory variables-based artificial neural network models for predicting fatty liver disease: a retrospective study.

**Table S1:** Comparing input and output variables in the three sets

| Variables         | Training set ( $N = 4,415$ ) | Validation set ( $N = 1,894$ ) | Testing set ( $N = 1,681$ ) | $p$ -value <sup>1</sup> | $p$ -value <sup>2</sup> |
|-------------------|------------------------------|--------------------------------|-----------------------------|-------------------------|-------------------------|
| Male gender       | 2078(47.0%)                  | 905(47.7%)                     | 863(51.3%)                  | 0.352                   | 0.010                   |
| Median age(years) | 36.8(±7.8)                   | 36.6(±7.9)                     | 39.4(±10.4)                 | 0.602                   | <0.001                  |
| TC(mmol/L)        | 4.6(±0.9)                    | 4.6(±0.8)                      | 5.0(±0.9)                   | 0.266                   | <0.001                  |
| TG(mmol/L)        | 1.6(±1.9)                    | 1.6(±1.4)                      | 1.8(±1.7)                   | 0.382                   | <0.001                  |
| HDL(mmol/L)       | 1.4(±0.4)                    | 1.4(±0.4)                      | 1.3(±0.4)                   | 0.943                   | <0.001                  |
| LDL(mmol/L)       | 3.0(±0.8)                    | 3.0(±0.8)                      | 3.1(±0.8)                   | 0.451                   | <0.001                  |
| ALT (U/L)         | 24.6(±25.3)                  | 23.5(±22.5)                    | 29.2(±25.8)                 | 0.092                   | <0.001                  |
| AST(U/L)          | 20.8(±13.0)                  | 20.3(±11.1)                    | 20.7(±10.2)                 | 0.178                   | <0.001                  |
| TP(g/L)           | 75.1(±3.9)                   | 75.2(±3.8)                     | 75.5(±4.0)                  | 0.489                   | 0.001                   |
| TBIL(μmol/L)      | 11.4(±5.4)                   | 11.5(±5.5)                     | 11.5(±5.1)                  | 0.402                   | 0.690                   |
| DBIL(μmol/L)      | 4.3(±1.6)                    | 4.3(±1.6)                      | 4.4(±1.6)                   | 0.848                   | 0.867                   |
| A/G               | 1.9(±0.3)                    | 1.9(±0.3)                      | 1.8(±0.3)                   | 0.311                   | 0.023                   |
| GLB(g/L)          | 26.6(±3.5)                   | 26.7(±3.4)                     | 28.1(±3.7)                  | 0.445                   | <0.001                  |
| ALB(g/L)          | 48.5(±2.6)                   | 48.5(±2.6)                     | 47.4(±2.5)                  | 0.983                   | <0.001                  |
| ALP(U/L)          | 68.8(±21.8)                  | 69.8(±24.1)                    | 72.8(±20.5)                 | 0.154                   | <0.001                  |
| GGT(U/L)          | 29.8(±34.8)                  | 29.2(±30.8)                    | 36.0(±34.6)                 | 0.578                   | <0.001                  |
| LDH(U/L)          | 160.1(±25.9)                 | 160.7(±26.6)                   | 167.1(±28.7)                | 0.356                   | <0.001                  |
| URE(mmol/L)       | 4.7(±1.2)                    | 4.7(±1.2)                      | 4.7(±1.1)                   | 0.505                   | 0.380                   |
| CRE(μmol/L)       | 72.0(±17.9)                  | 72.3(±15.5)                    | 73.0(±15.1)                 | 0.615                   | 0.153                   |
| UA(μmol/L)        | 335.4(±96.2)                 | 335.8(±97.3)                   | 354.5(±99.6)                | 0.871                   | <0.001                  |

Results are shown as the mean ± SD.  $p$ -value<sup>1</sup> were calculated between the data of the training set and the validation set.  $p$ -value<sup>2</sup> were calculated among the data of the training set, the validation set and the testing set.
